# Supplementary material for: The Potential Use of Plant Growth Regulators for Modification of the Industrially Valuable Volatile Compounds Synthesis in Hylocreus undatus Stems
Source: MDPI journal article supplement (doi:10.3390/molecules28093843), 2023-05-01
Supplement: s1 [file s1]

**Table S1.** Modification the chemical composition using chemical and physical factor in plants under the conditions

| Species                       | Modifying factor/conditions                                                                     | Effect                                                                                                                                                                  | References   |
|-------------------------------|-------------------------------------------------------------------------------------------------|-------------------------------------------------------------------------------------------------------------------------------------------------------------------------|--------------|
| <i>Hylocereus polyrhizus</i>  | Polyphenol oxidase, CYP76AD3 and 4,5-DOPA dioxygenase extradiol-like protein;<br><i>in vivo</i> | Betaine biosynthesis                                                                                                                                                    | [29]         |
| <i>Hylocereus monacanthus</i> | Autopolyploization;<br><i>in vivo</i>                                                           | Reduction in the concentration of sugars and betacyanins, increase in the amount of amino acids, intermediates of the TCA cycle, organic acids and flavonoids           | [30]         |
| <i>Amaranthus caudatus</i>    | Cytokines<br><i>in vivo</i>                                                                     | Increase in the content of betacyanins                                                                                                                                  | [42]<br>[43] |
| <i>Amaranthus caudatus</i>    | Absciscic acid (ABA)<br><i>in vivo</i>                                                          | Decrease in betacyanin content                                                                                                                                          | [44]         |
| <i>Hylocereus undatus</i>     | Trypsin<br><i>in vivo</i>                                                                       | Fatty acid elongation three unsaturated fatty acids were upregulated, while eight saturated fatty acids were downregulated                                              | [31]         |
| <i>Hylocereus polyrhizus</i>  | Heat stress + 40°C<br><i>in vivo</i>                                                            | Content increase glycerol tributanoate, cis-aconitate, L-isoleucine, and mesaconic acid                                                                                 | [32]         |
| <i>Hylocereus undatus</i>     | Induced wound<br><i>in vivo</i>                                                                 | Phenol biosynthesis                                                                                                                                                     | [33]         |
| <i>Solanum lycopersicum</i>   | Biotic and abiotic stress<br><i>in vivo</i>                                                     | Increasing the accumulation of carotenoids                                                                                                                              | [45]         |
| <i>Hylocereus polyrhizus</i>  | Red light radiation of fruit<br><i>in vivo</i>                                                  | Decrease in D-fructose, D-glucose, mannose, sorbose, D-turanose, glucopyranose and D-glucopyranoside<br><br>content of octadecanoic acid, hexadecanoic acid, eicosanoic | [34]         |

|                                 |                                                                                                         |                                                                                                                                                                                                                                                                                                                                             |      |
|---------------------------------|---------------------------------------------------------------------------------------------------------|---------------------------------------------------------------------------------------------------------------------------------------------------------------------------------------------------------------------------------------------------------------------------------------------------------------------------------------------|------|
|                                 |                                                                                                         | <p>acid, ethanedioic acid, pentanedioic acid and tyrosine</p> <p>volatile compounds have changed significantly</p> <p>content of hexanal, 2-hexenal, 2-heptenal and 4-heptenal significantly decreased, cyclohexenone, 1-hexanol significantly increased</p> <p>2-hydroxy-cyclopentadecanone and 2-octenal acid increased significantly</p> |      |
| <i>Hylocereus undatus</i>       | <p>Red and blue light in a ratio of 1 : 2</p> <p><i>in vitro</i></p>                                    | <p>Accumulation of sucrose, glucose, fructose, fructose-6-phosphate, fatty acid and flavonoids increased significantly</p>                                                                                                                                                                                                                  | [35] |
| <i>Hylocereus polyrhizus</i>    | <p>PEG-induced drought stress</p> <p><i>in vitro</i></p>                                                | <p>Increased osmolyte accumulation, lipid peroxidation and antioxidant enzyme activity</p>                                                                                                                                                                                                                                                  | [36] |
| <i>Hylocereus costaricensis</i> | <p>Elicitors (silver nitrate, yeast extract), amino acids, tyrosine, leucine</p> <p><i>in vitro</i></p> | <p>Increasing the content of betaine</p>                                                                                                                                                                                                                                                                                                    | [37] |
|                                 | <p>Red light</p> <p><i>in vitro</i></p>                                                                 | <p>Enhanced betalain synthesis 3,8-fold and 4,8-fold</p>                                                                                                                                                                                                                                                                                    |      |
| <i>Hylocereus polyrhizus</i>    | <p>Tyrosine</p> <p><i>in vitro</i></p>                                                                  | <p>Supporting the accumulation of betacyanin, betaxanthin, phenol and flavonoids</p>                                                                                                                                                                                                                                                        | [38] |
| <i>Berberis vulgaris</i>        | <p>Tyrosine</p> <p><i>in vitro</i></p>                                                                  | <p>Increase in betacyanin content</p>                                                                                                                                                                                                                                                                                                       | [46] |
| <i>Hylocereus polyrhizus</i>    | <p>Methyl jasmonate</p> <p><i>in vivo</i></p>                                                           | <p>Fruit treatment increases betacyanin content and antioxidant activity</p>                                                                                                                                                                                                                                                                | [39] |
| <i>Hylocereus costaricensis</i> | <p>Low sucrose</p> <p><i>in vitro</i></p>                                                               | <p>Stimulation of the activity of betalain compounds and antioxidants</p>                                                                                                                                                                                                                                                                   | [40] |

|                                       |                                                                                                     |                                                                                                                          |      |
|---------------------------------------|-----------------------------------------------------------------------------------------------------|--------------------------------------------------------------------------------------------------------------------------|------|
| <i>Hylocereus polyrhizus</i>          | Salicylic acid<br><i>in vitro</i>                                                                   | Increase in the production of betalains                                                                                  | [41] |
| <i>Alternanthera tenella</i>          |                                                                                                     |                                                                                                                          | [47] |
| <i>Elaeagnus angustifolia</i>         |                                                                                                     | Increase in alpha-tocopherol synthesis                                                                                   | [48] |
| <i>Vitis vinifera</i>                 |                                                                                                     | Increasing anthocyanin synthesis                                                                                         | [49] |
| <i>Andrographis paniculata</i>        |                                                                                                     | Increasing the synthesis of flavonoids                                                                                   | [50] |
| <i>Mentha piperita</i> L.             | 2-Isopentyladenine (2iP) and indolyl-3-acetic acid (IAA)<br><i>in vitro</i>                         | Increasing the content of mentofuro lactone                                                                              | [51] |
| <i>Phoenix dactylifera</i> L.         | 2-Isopentyladenine (2iP) and 2,4-dichlorophenoxyacetic acid (2,4-D)<br><i>in vitro</i>              | Increasing the production of phenolic compounds, flavonoids                                                              | [52] |
| <i>Vaccinium corymbosum</i> L.        | Zeatin<br><i>in vitro</i>                                                                           | Increasing the content of lipophilic compounds                                                                           | [53] |
| <i>Hordeum</i> Spring barley          | (6-(3-methoxybenzylamino)-9-(β-d-arabinofuranosyl)purine - cytokinin derivative)<br><i>in vitro</i> | Grain yield increase                                                                                                     | [54] |
| <i>Artemisia argyi</i>                | Absciscic acid (ABA)<br><i>in vivo</i>                                                              | Stimulates the biosynthesis of many secondary metabolites, including phenylpropanoids, flavonoids, terpenoids, alkaloids | [55] |
| <i>Calendula officinalis</i>          | Jasmonic acid<br><i>in vitro</i>                                                                    | Increasing the synthesis of saponins                                                                                     | [56] |
| <i>Solanum lycopersicum</i> cv. Grape | methyl jasmonate<br><i>in vivo</i>                                                                  | Induced the production of amino acids and fatty acids inducing the accumulation of α-tocopherol and β-sitosterol         | [57] |
| <i>Brassica napus</i> L.              | Gibberellic acid (GA3)                                                                              | Increase in the content of oleic acid                                                                                    | [58] |

|                                            |                                                                                                         |                                                                                                                                                                         |      |
|--------------------------------------------|---------------------------------------------------------------------------------------------------------|-------------------------------------------------------------------------------------------------------------------------------------------------------------------------|------|
|                                            | <i>in vivo</i>                                                                                          |                                                                                                                                                                         |      |
| <i>Nitraria tangutorum</i>                 | Indolyl-3-acetic acid (IAA),<br>abscisic acid (ABA) and<br>gibberellic acid (GA3)<br><br><i>in vivo</i> | significantly increased the<br>content of osmotic regulatory<br>substances (soluble sugar,<br>soluble protein, and proline)<br>and antioxidant enzymes<br>(SOD and POD) | [59] |
| <i>Nelumbo nucifera</i><br>Gaertn          | Absciscic acid (ABA)<br><br><i>in vivo</i>                                                              | Increase in starch content                                                                                                                                              | [60] |
| <i>Lavendula angustifolia</i><br>'Luoshen' | Methyl jasmonate<br><br><i>in vivo</i>                                                                  | Increase in the content of<br>volatile substances<br>(monoterpenoids and<br>sesquiterpenoids)                                                                           | [61] |
| <i>Citrus sinensis</i> L.<br>Osbeck        | Methyl jasmonate<br><br><i>in vivo</i>                                                                  | Change in the content of<br>volatile compounds increase in<br>the emission of E- $\beta$ -ocimene,<br>indole                                                            | [62] |
| <i>Quercus pyrenaica</i>                   | Methyl jasmonate<br><br><i>in vivo</i>                                                                  | Overall composition did not<br>differ but showed higher<br>emissions of volatile<br>compounds                                                                           | [63] |
